# Supplementary material
Source: publisher figshare collection journal article supplement (https://tandf.figshare.com/articles/dataset/_/2066763)
Supplement: Supplementary file 1 [file 1]

# Storglaciären DEM and extent

Surveyed 24th July to  
4th August, 2010

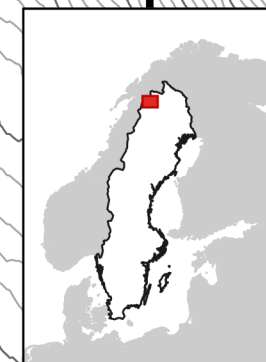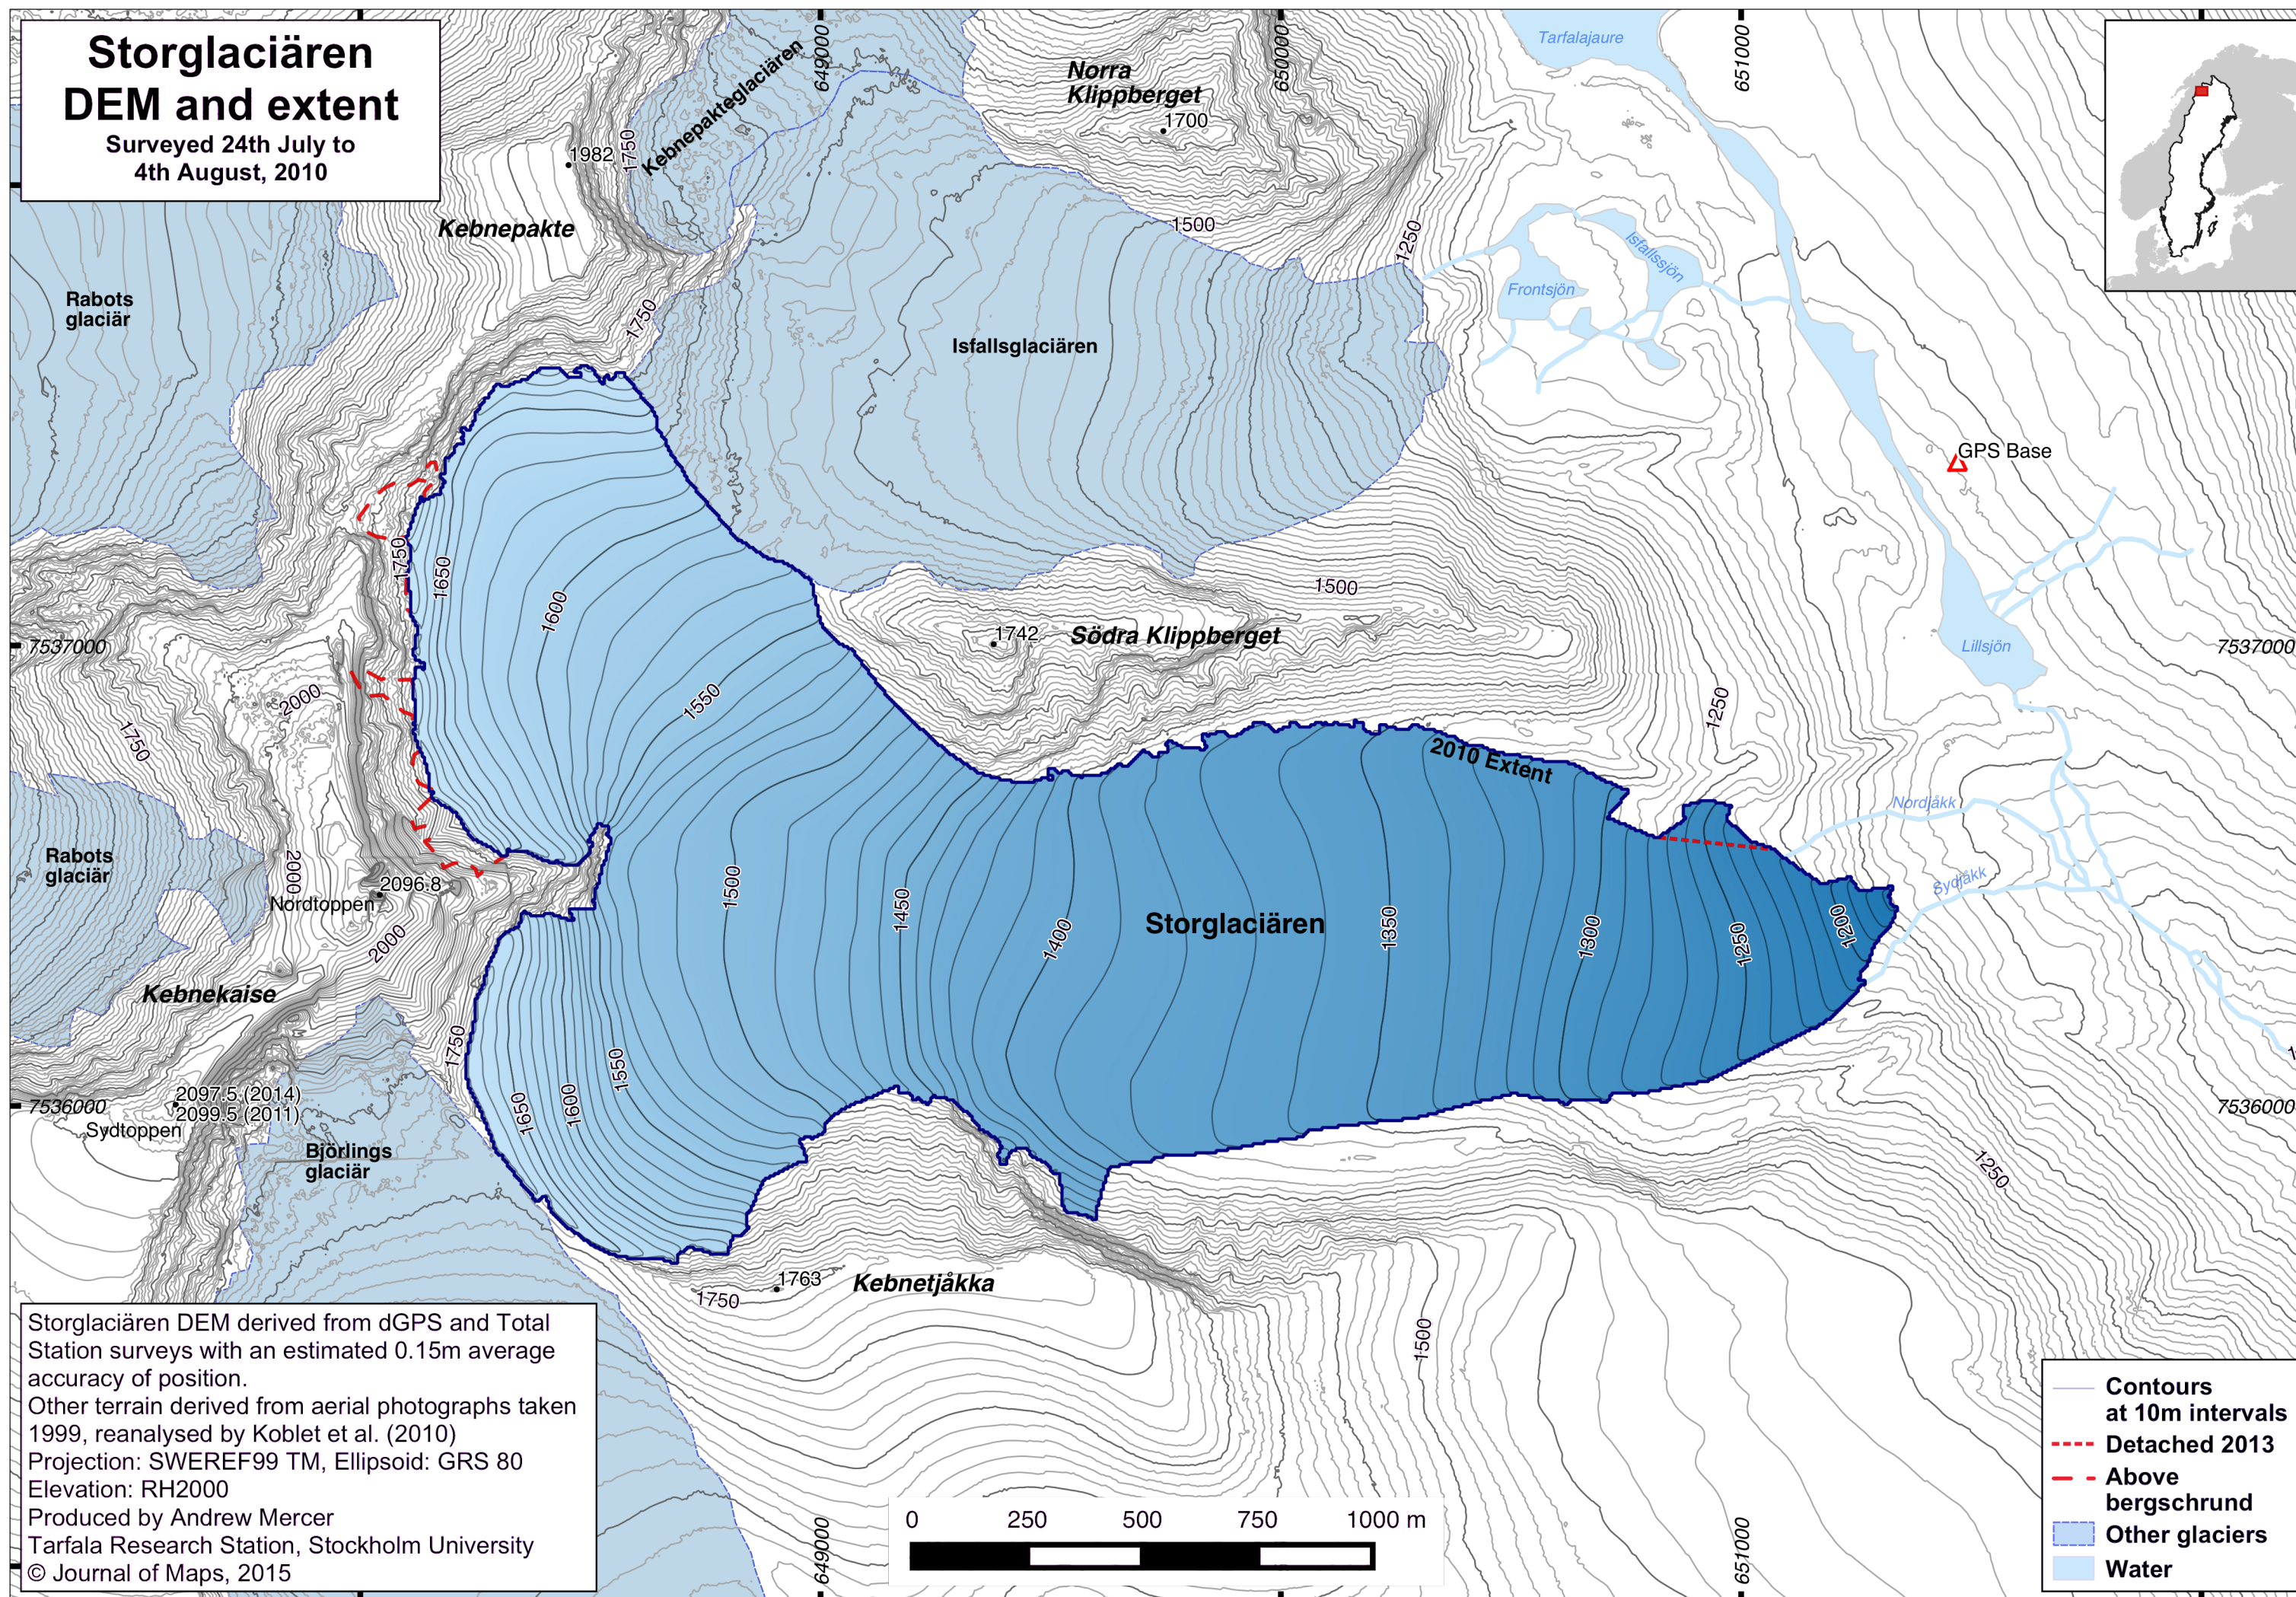

Storglaciären DEM derived from dGPS and Total Station surveys with an estimated 0.15m average accuracy of position.  
Other terrain derived from aerial photographs taken 1999, reanalysed by Koblet et al. (2010)  
Projection: SWEREF99 TM, Ellipsoid: GRS 80  
Elevation: RH2000  
Produced by Andrew Mercer  
Tarfala Research Station, Stockholm University  
© Journal of Maps, 2015

- Contours at 10m intervals
- Detached 2013
- Above bergschrund
- Other glaciers
- Water
